# Supplementary figures and images for: High Color Purity Plasmonic Color Filter by One-Dimensional Photonic Crystals
Source: MDPI journal article supplement (doi:10.3390/nano12101694), 2022-05-16

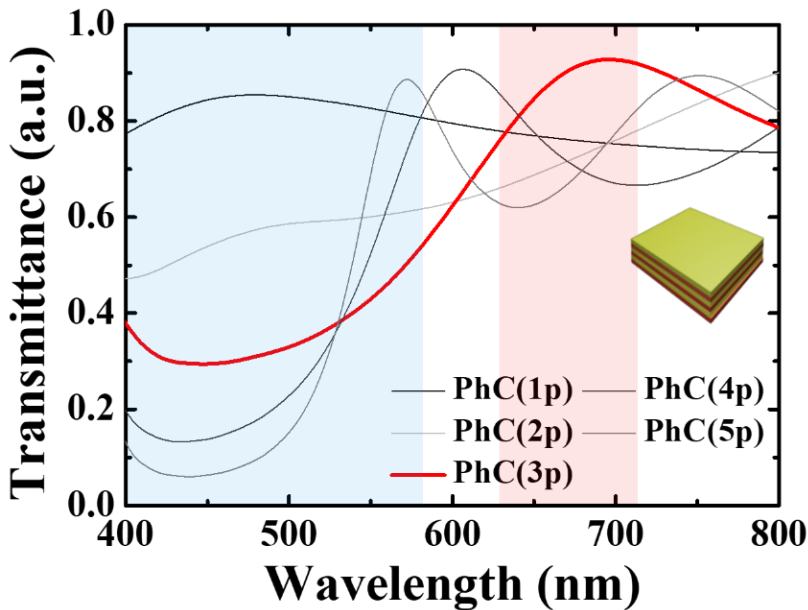

Figure S1. Transmission spectra of LiF/ WO<sub>3</sub> pairs.

Supplement: s1 [file s1]
